# Supplementary material for: IL-6–targeted therapies to block the cytokine or its receptor drive distinct alterations in T cell function
Source: PubMed Central journal article supplement (PMC9746808; doi:10.1172/jci.insight.159436), 2022-11-22
Supplement: jciinsight-7-159436-s178.pdf [file jciinsight-7-159436-s178.pdf]

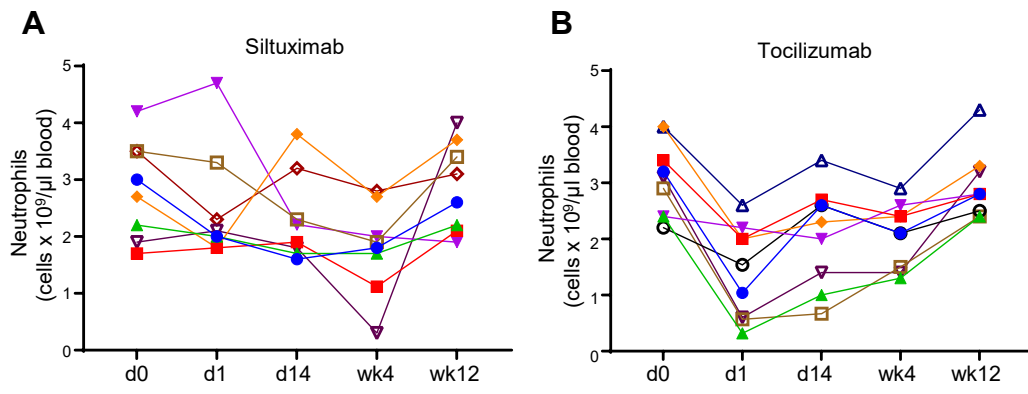

**Supplemental Figure 1. Differential effects of siltuximab and tocilizumab on neutrophil counts.** Neutrophil numbers were derived from complete blood counts (CBC) at each time point. Each line represents an individual subject; (A) siltuximab (n=10) and (B) tocilizumab (n=9).

**A**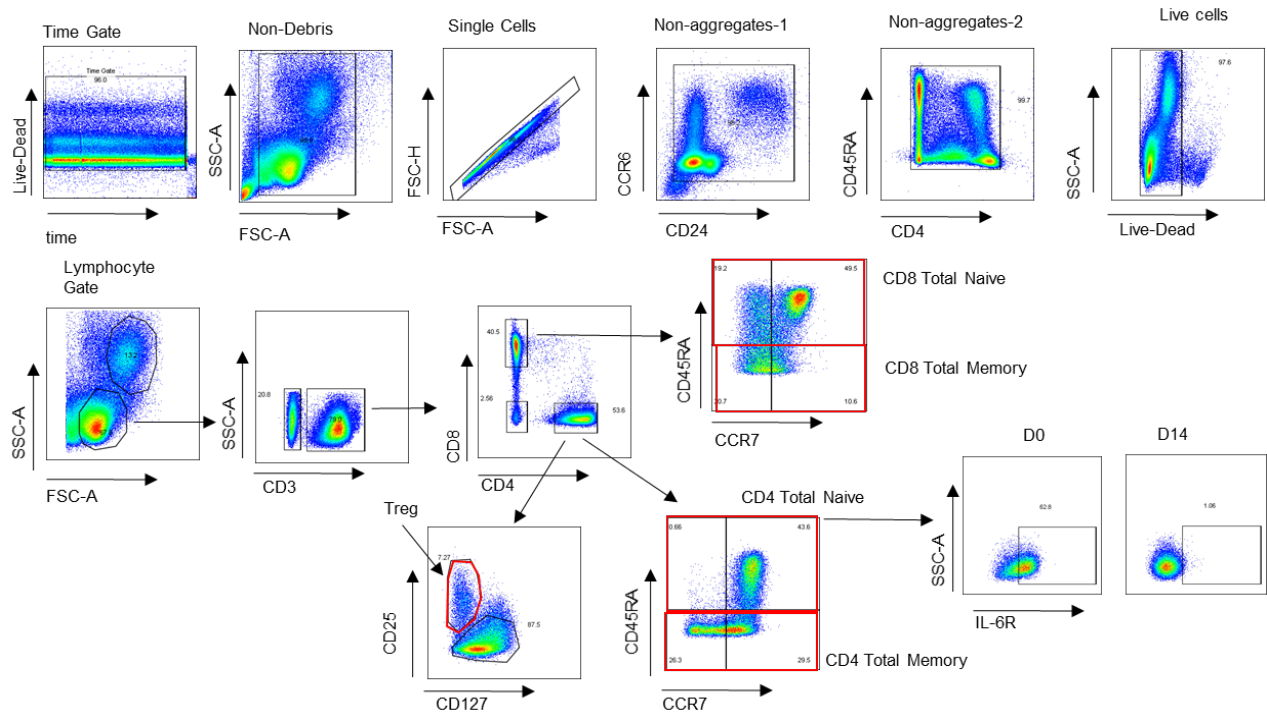**B** Siltuximab: Soluble IL-6R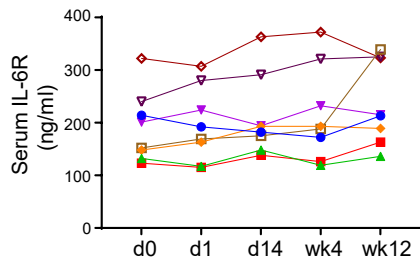

**Supplemental Figure 2. Cell surface IL-6 receptor (IL-6R) gating strategy and soluble IL-6R serum levels (A) Cell surface IL-6R gating strategy (B) Serum levels of soluble IL-6R in the siltuximab cohort (n=8) measured by ELISA. Each line represents an individual subject.**

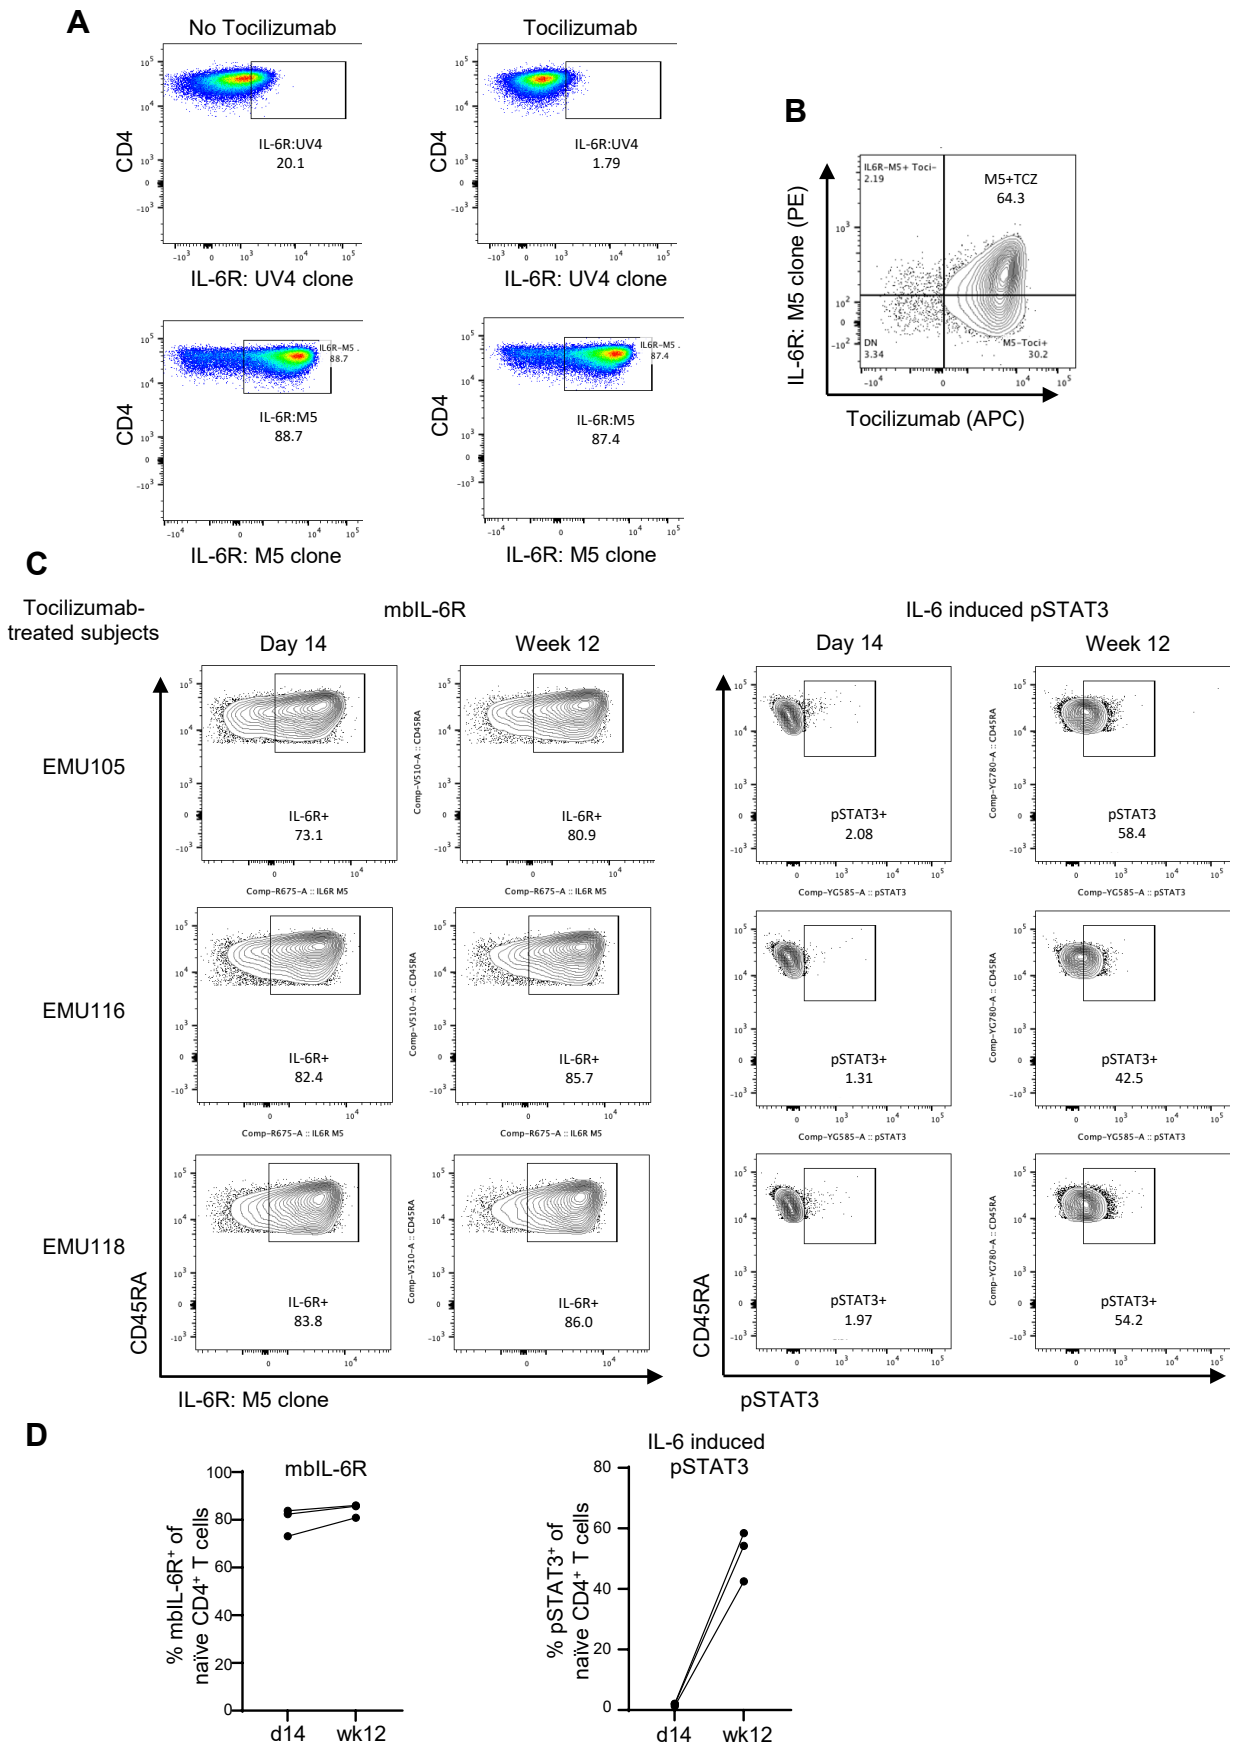

**Supplemental Figure 3. mbIL-6R staining with UV4 and M5 monoclonal anti-IL-6R antibodies.** (A) PBMC from a healthy control subjects cultured *in vitro* with or without tocilizumab (200 $\mu$ g/ml for 30 minutes) and then stained with UV4 or M5 monoclonal anti-IL-6R antibodies; gating shown for CD4<sup>+</sup> T cells (B) Dual staining with APC-labeled tocilizumab and PE-labeled M5 monoclonal anti-IL-6R antibody on PBMC from healthy control subject; gating shown for naïve CD4<sup>+</sup> T cells. (C) PBMC from three tocilizumab-treated individuals at day 14 and week 12 stained with M5 monoclonal anti-IL-6R antibody (*Left*) or pSTAT3 antibody (*Right*); gating shown for naïve CD4<sup>+</sup> T cells. PBMC were stained with pSTAT3 antibody following stimulation with IL-6 (2ng/ml for 10 minutes) with gating shown for naïve CD4<sup>+</sup> T cells. (D) Data from C quantified; frequency of mbIL-6R<sup>+</sup> cells (*Left*) and pSTAT3<sup>+</sup> cells (*Right*) in naïve CD4<sup>+</sup> T cell compartment.

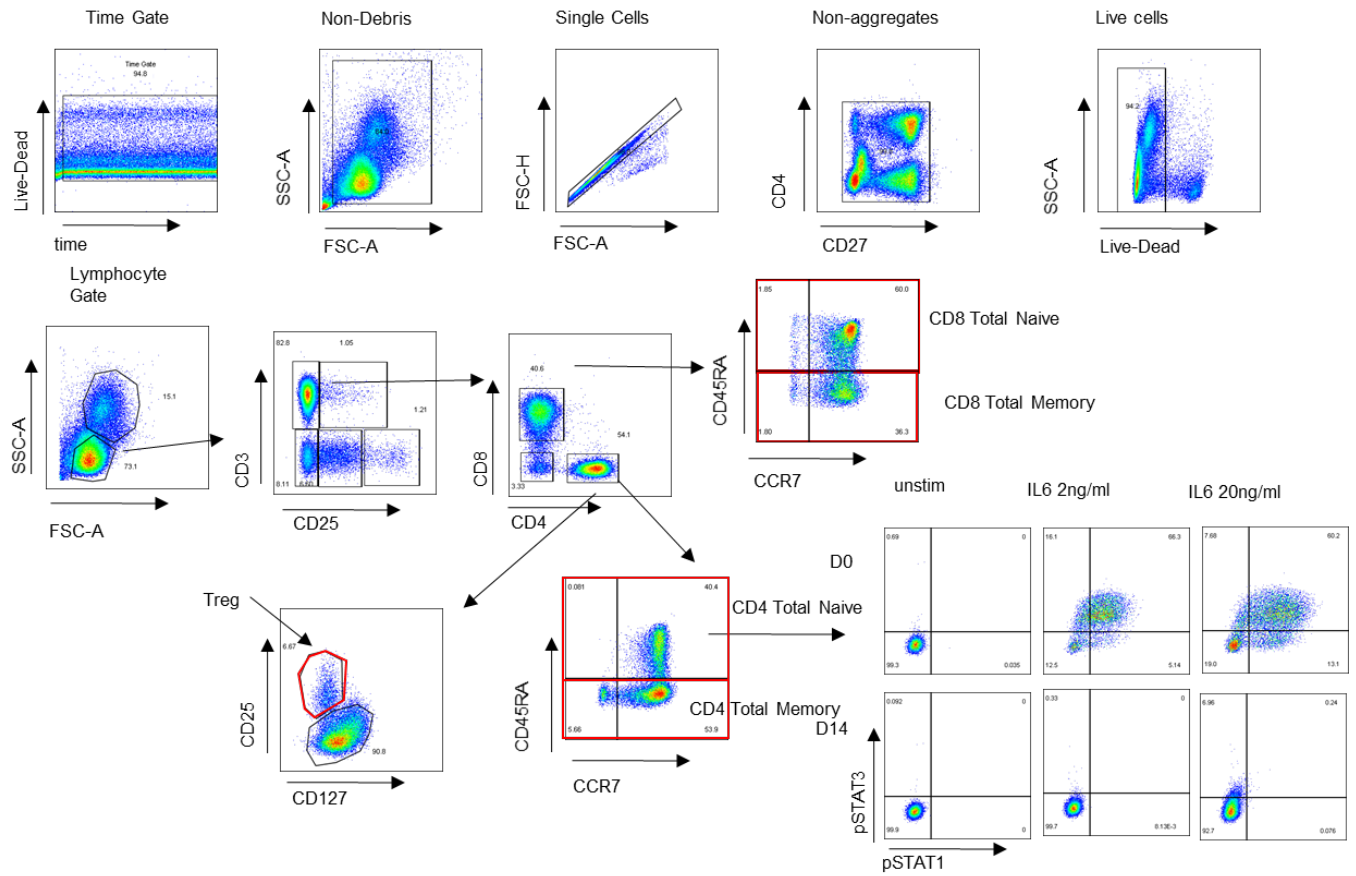

**Supplemental Figure 4. IL-6-induced pSTAT1/3 gating**

**A** memory CD4<sup>+</sup> Teff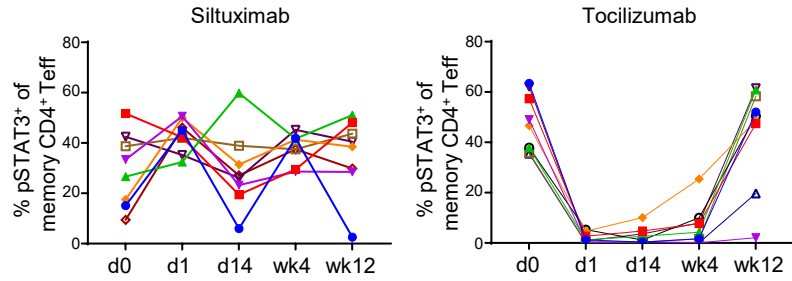**B** CD4<sup>+</sup> Tregs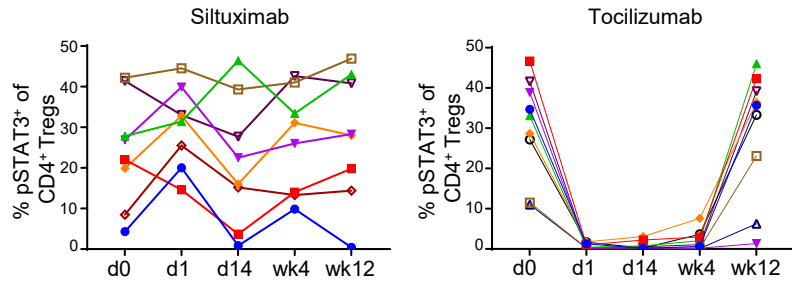**C** memory CD8<sup>+</sup> T cells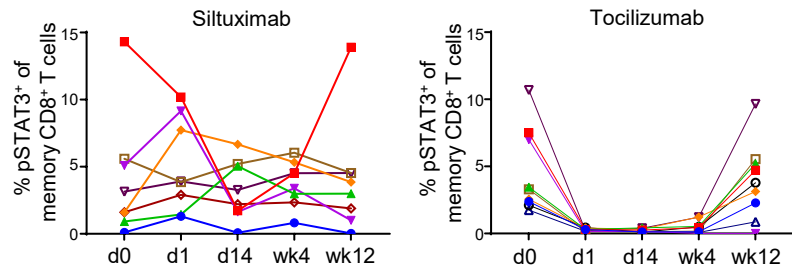

**Supplemental Figure 5. Tocilizumab but not siltuximab suppresses IL-6-mediated phosphorylation of STAT3 in T cells.** Thawed and rested PBMCs from siltuximab-treated or tocilizumab-treated T1D subjects were treated with recombinant IL-6 (2 ng/ml) for 10 minutes followed by staining for pSTAT3. Each line represents an individual subject; n=10 for siltuximab and n=9 for tocilizumab. Frequency of IL-6-induced pSTAT3-positive cells in the following T cell compartments (A) memory CD4<sup>+</sup> Teff, (B) CD4<sup>+</sup> Tregs, and (C) memory CD8<sup>+</sup> T cells.

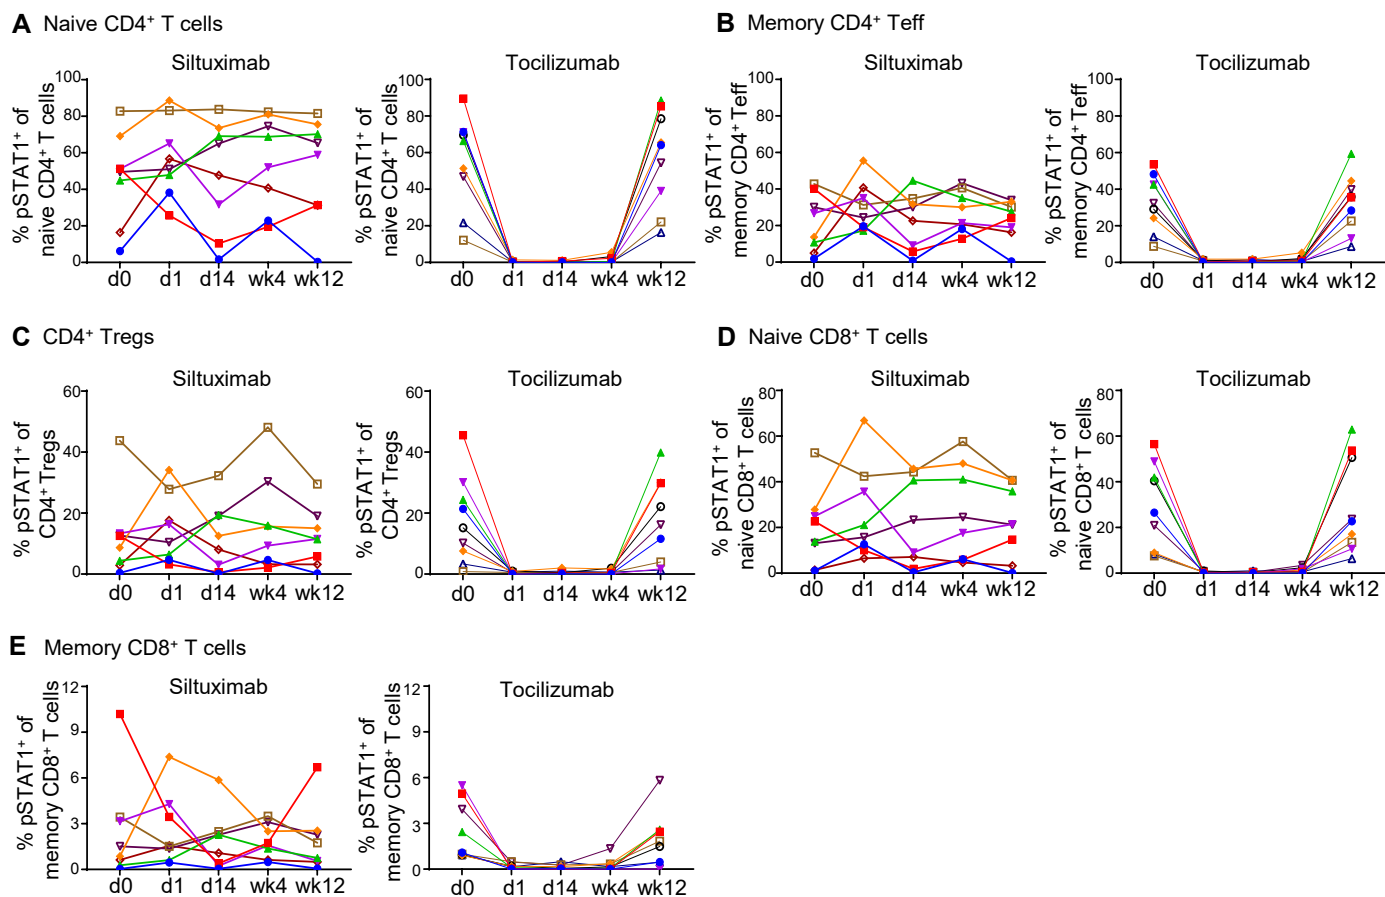

**Supplemental Figure 6. Tocilizumab but not siltuximab suppresses IL-6-mediated phosphorylation of STAT1 in T cells.** Thawed and rested PBMCs from siltuximab-treated or tocilizumab-treated T1D subjects were treated with recombinant IL-6 (2 ng/ml) for 10 minutes followed by staining for pSTAT1. Each line represents an individual subject; n=10 for siltuximab and n=9 for tocilizumab. Frequency of IL-6-induced pSTAT1<sup>+</sup> cells in the following T cell compartments: (A) naïve CD4<sup>+</sup> T cells (B) memory CD4<sup>+</sup> T cells, (C) CD4<sup>+</sup> Tregs, (D) naïve CD8<sup>+</sup> T cells and (E) memory CD8<sup>+</sup> T cells.

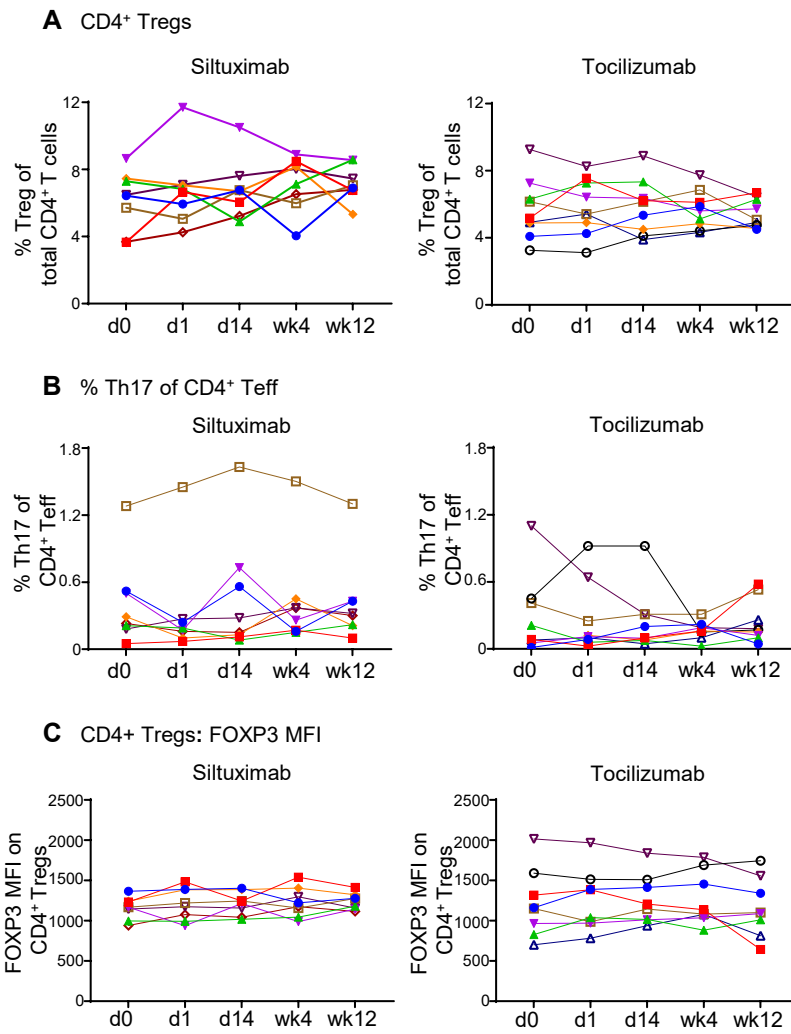

**Supplemental Figure 7. Effect of siltuximab and tocilizumab on CD4<sup>+</sup> Tregs and Th17 cells.** Each line represents an individual subject; n=8 for siltuximab and n=8 for tocilizumab except for a where n=9. **(A)** Frequency of Tregs (CD4<sup>+</sup>CD25<sup>hi</sup>CD127<sup>lo</sup>) in CD4<sup>+</sup> T cell compartment. **(B)** Frequency of Th17 cells (CD4<sup>+</sup>FOXP3<sup>+</sup>IL-17<sup>+</sup>) in CD4<sup>+</sup> Teff compartment. **(C)** FOXP3 mean fluorescence intensity (MFI) on CD4<sup>+</sup> Tregs

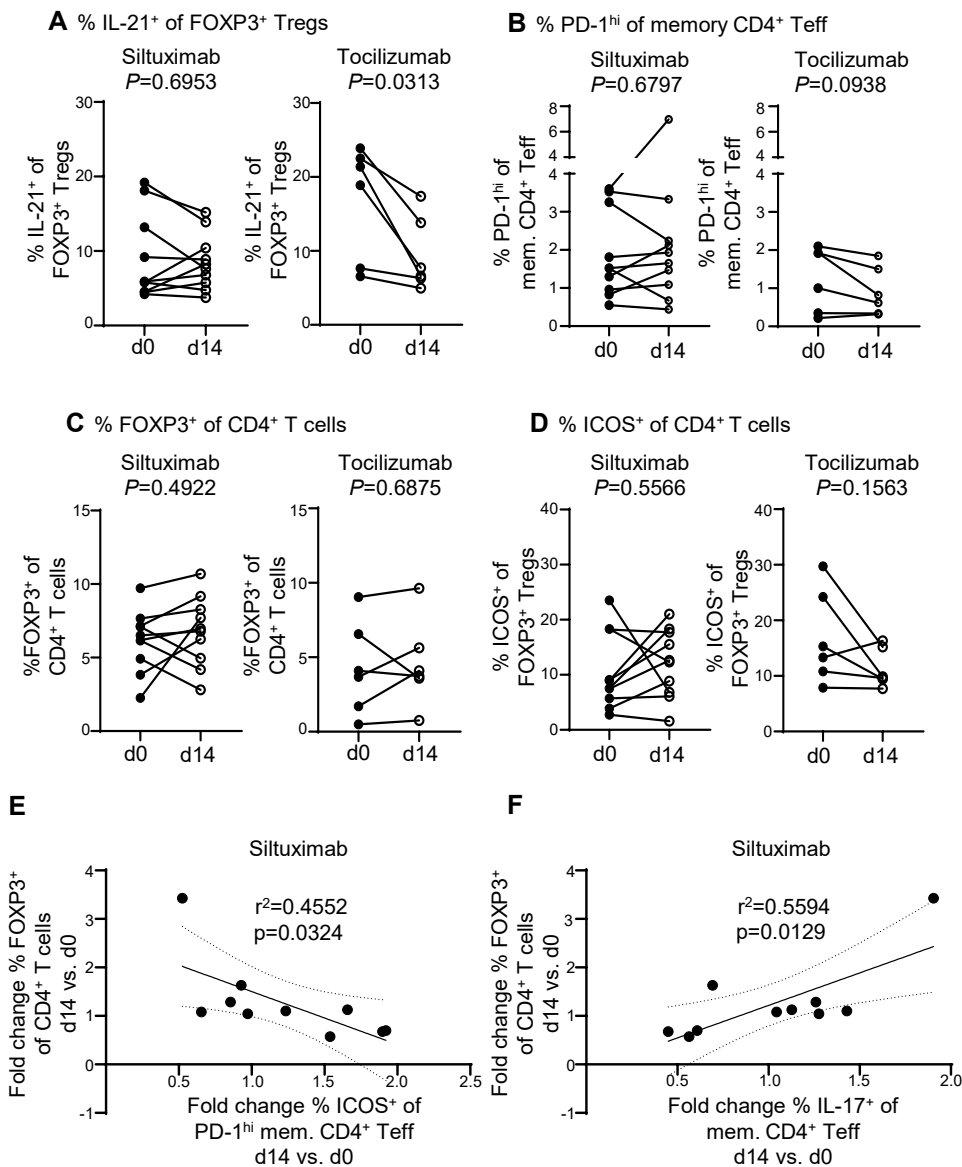

**Supplemental Figure 8. Tocilizumab but not siltuximab decreases ICOS expression of T follicular helper cells.** Thawed and rested PBMCs from siltuximab-treated or tocilizumab-treated T1D subjects were stimulated with PMA/ionomycin for 1 hour followed by an additional 3 hours in the presence of Brefeldin A. Each line represents an individual subject;  $n=10$  for siltuximab and  $n=6$  for tocilizumab. Solid circles represent day 0 prior to drug infusion (d0) and open circles represent day 14 post drug (d14). (A) Frequency of IL-21<sup>+</sup> cells in FOXP<sup>+</sup> Treg compartment. (B) Frequency of PD-1<sup>hi</sup> cells in memory CD4<sup>+</sup> T cell compartment. (C) Frequency of FOXP3<sup>+</sup> cells in CD4<sup>+</sup> T cell compartment. (D) Frequency of ICOS<sup>+</sup> cells in FOXP<sup>+</sup> Treg compartment. (E) Linear regression for siltuximab cohort showing negative correlation between fold change d14 versus d0 for frequency of ICOS<sup>+</sup> cells in PD-1<sup>hi</sup> memory CD4<sup>+</sup> T cell compartment and fold change d14 versus d0 for frequency of FOXP3<sup>+</sup> cells in memory CD4<sup>+</sup> T cell compartment. (F) Linear regression for siltuximab cohort showing positive correlation between fold change d14 versus d0 for frequency of IL-17<sup>+</sup> cells in memory CD4<sup>+</sup> T cell compartment and fold change d14 versus d0 for frequency of FOXP3<sup>+</sup> cells in memory CD4<sup>+</sup> T cell compartment. Statistical tests: (A-D) Wilcoxon matched-pairs signed rank test; and (E and F) linear regression.



## A Gating Strategy

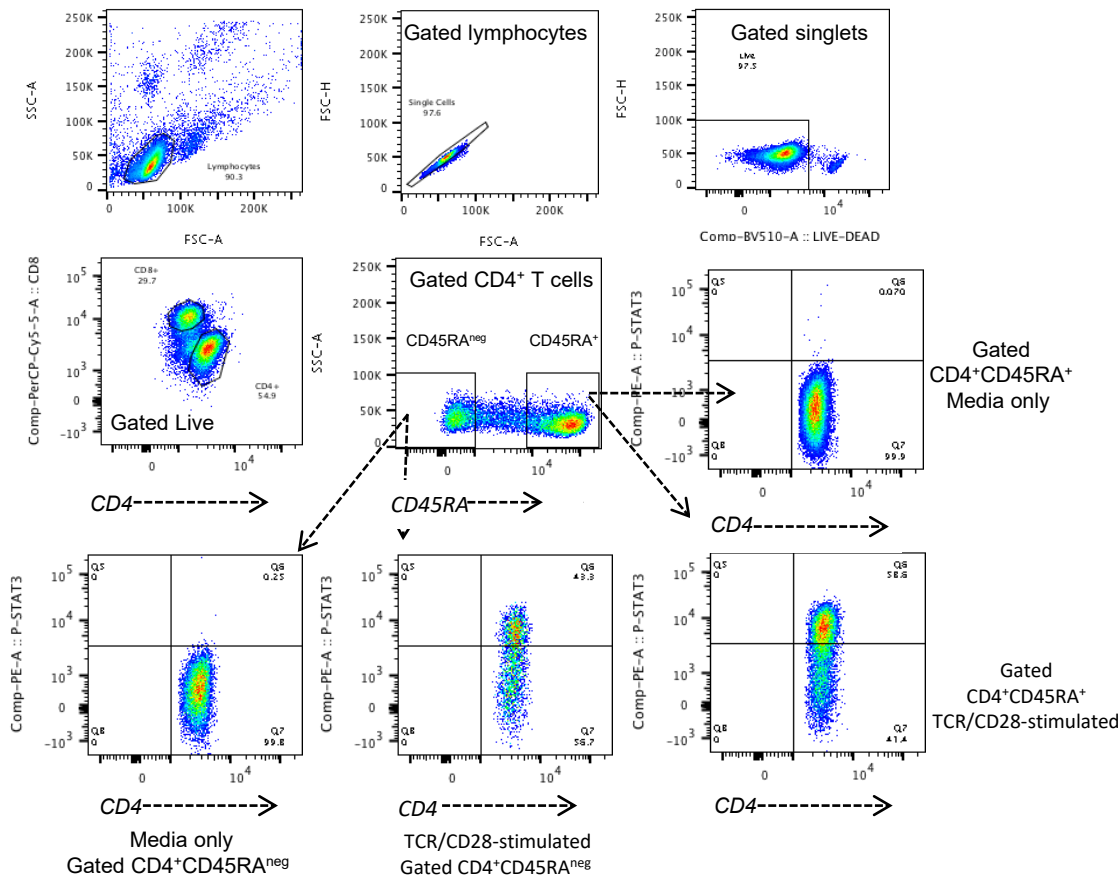

## B Memory CD4<sup>+</sup> Teff: TCR/pSTAT3 gMFI

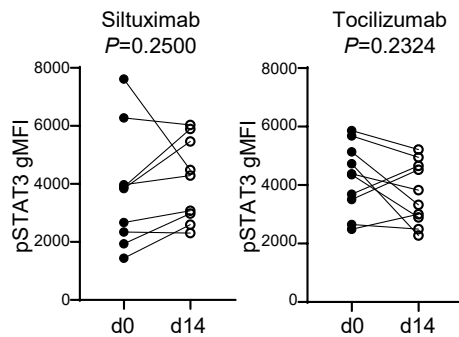

## C Memory CD4<sup>+</sup> Teff: TCR/ % pSTAT3<sup>+</sup>

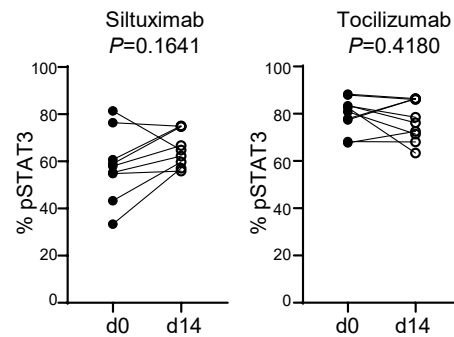

## D Memory CD4<sup>+</sup> Teff: Total STAT3 gMFI

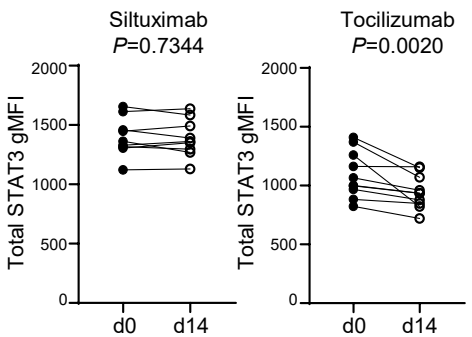

## E Naive CD8<sup>+</sup> T cells: TCR/pSTAT3 gMFI

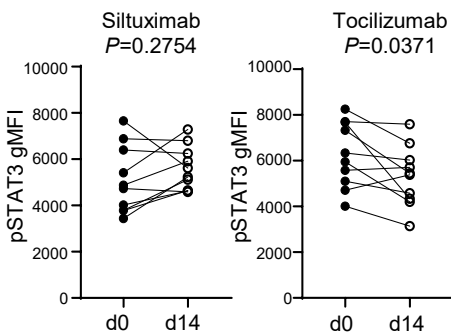

## F Naive CD8<sup>+</sup> T cells: TCR/ % pSTAT3<sup>+</sup>

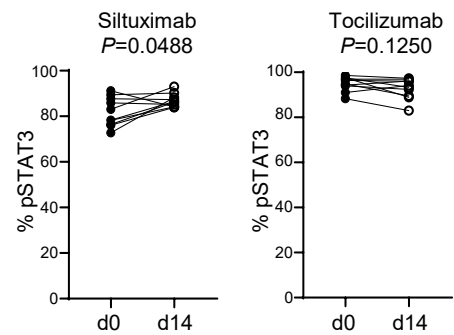

## G Naive CD8<sup>+</sup> T cells: Total STAT3 MFI

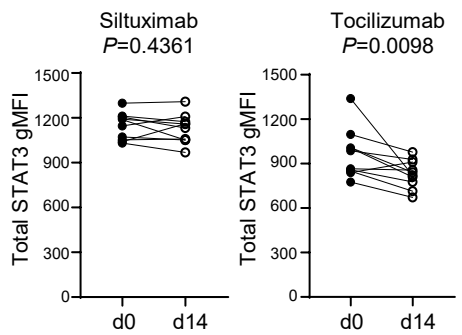

**Supplemental Figure 9. Effects of siltuximab and tocilizumab on TCR-induced pSTAT3 signaling in memory CD4<sup>+</sup> T cells and naïve CD8<sup>+</sup> T cells.** Enriched pan T cells from siltuximab-treated or tocilizumab-treated T1D subjects were stimulated or not with anti-CD3/anti-CD28 coated beads for four hours. Each line represents an individual subject; solid circles represent day 0 prior to administration of drug (d0) and open circles represent day 14 post drug (d14). (A) Gating strategy from a representative siltuximab-treated subject. (B-D) Memory CD4<sup>+</sup>CD45RA<sup>neg</sup> T cells; siltuximab n=9, tocilizumab n=10. (B) pSTAT3 gMFI (C) Frequency of pSTAT3<sup>+</sup> cells (D) Total STAT3 MFI (E-G) Naive CD8<sup>+</sup>CD45RA<sup>+</sup> T cells; siltuximab n=10, tocilizumab n=10. (E) pSTAT3 gMFI. (F) Frequency of pSTAT3<sup>+</sup> cells (G) Total STAT3 MFI. Statistical test: Wilcoxon matched-pairs signed rank test.

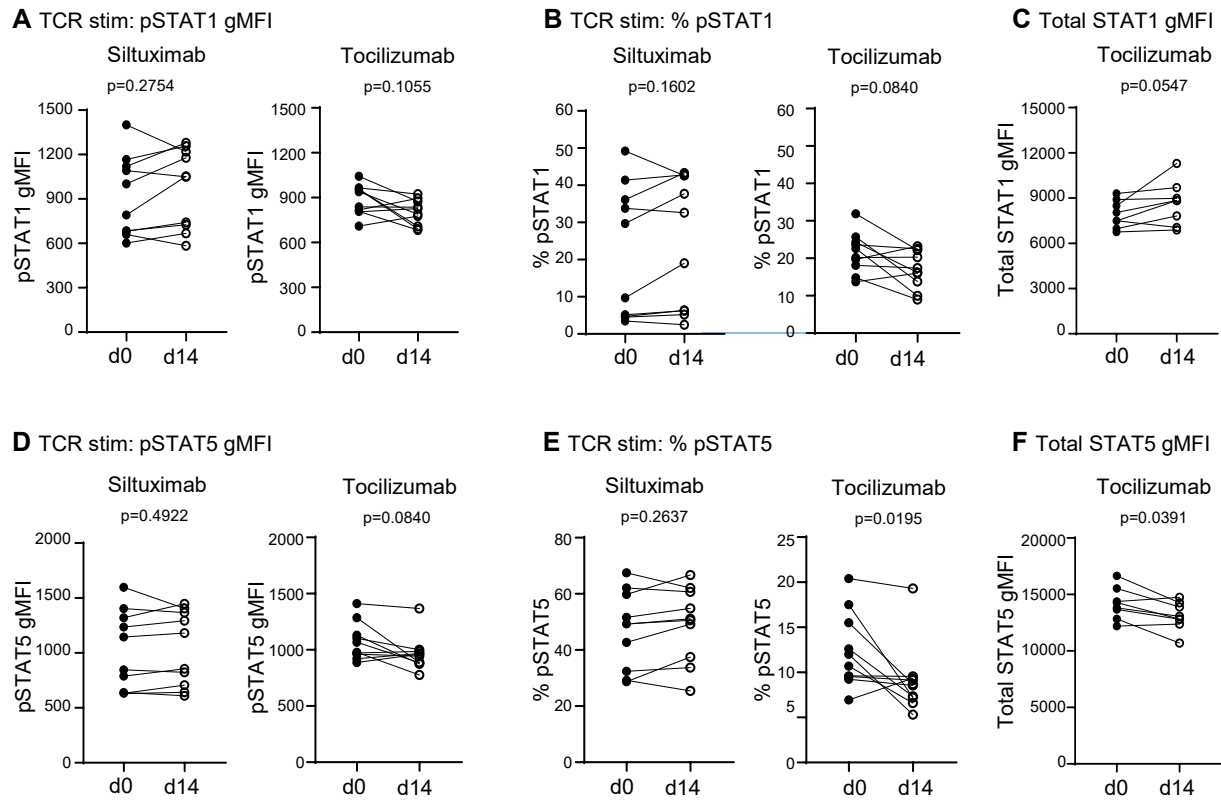

**Supplemental Figure 10. Effects of siltuximab and tocilizumab on TCR-induced pSTAT1 and pSTAT5 signaling in naïve CD4<sup>+</sup> T cells.** (A, B, D, E) Enriched pan T cells from siltuximab-treated T1D subjects or tocilizumab-treated T1D subjects were stimulated or not with anti-CD3/anti-CD28 coated beads for four hours. Cells were stained for pSTAT1 and pSTAT5. (C, F) Enriched total CD4<sup>+</sup> T cells from tocilizumab-treated subjects were stained for total STAT1 and total STAT5. (A-F) Each line represents an individual subject; solid circles represent day 0 prior to administration of drug (d0) and open circles represent day 14 post drug (d14). (A) pSTAT1 gMFI of gated naïve CD4<sup>+</sup> T cells: siltuximab n=10, gated CD4<sup>+</sup>CD45RA<sup>+</sup> T cells; tocilizumab n=10, gated CD4<sup>+</sup>CD27<sup>+</sup>CD45RA<sup>+</sup> T cells. (B) Frequency of pSTAT1<sup>+</sup> cells in the naïve CD4<sup>+</sup> T cell compartment; siltuximab n=10 and tocilizumab n=10. (C) Total STAT1 gMFI of unstimulated naïve CD4<sup>+</sup> T cells, n=8. (D) pSTAT5 MFI of gated naïve CD4<sup>+</sup> T cells; siltuximab n=10 and tocilizumab n=10. (E) Frequency of pSTAT5-positive cells in the naïve CD4<sup>+</sup> T cell compartment; siltuximab n=10 and tocilizumab n=10. (F) Total STAT5 MFI of unstimulated naïve CD4<sup>+</sup> T cells, n=8. Statistical test: Wilcoxon matched-pairs signed rank test.

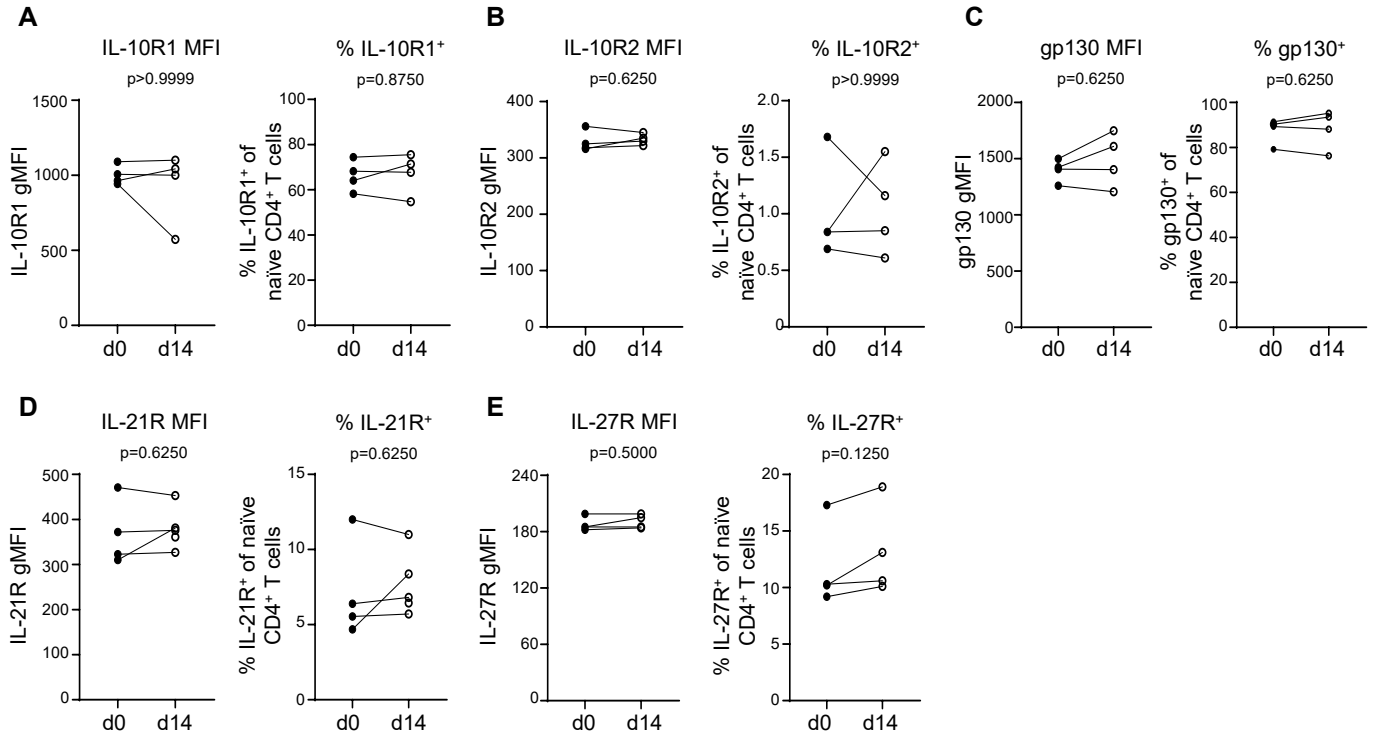

**Supplemental Figure 11. Effect of siltuximab on cell surface expression of cytokine receptors.** Enriched total CD4<sup>+</sup> T cells from siltuximab-treated T1D subjects were stimulated with anti-CD3/anti-CD28 coated beads for four hours followed by cell surface staining for cytokine receptors. Each line represents an individual subject; solid circles represent day 0 prior to administration of drug (d0) and open circles represent day 14 post drug (d14). (A) *left*, IL-10R1 MFI (n=4); *right*, frequency of IL-10R1<sup>+</sup> cells (n=4). (B) *left*, IL-10R2 MFI (n=4); *right*, frequency of IL-10R2<sup>+</sup> cells (n=4). (C) *left*, gp130 MFI (n=4); *right*, frequency of gp130<sup>+</sup> cells (n=4). (D) *left*, IL-21R MFI (n=4); *right*, frequency of IL-21R<sup>+</sup> cells (n=4). (E) *left*, IL-27R MFI (n=4); *right*, frequency of IL-27R<sup>+</sup> cells (n=4). Statistical test: Wilcoxon matched-pairs signed rank test.

**Supplemental Table 1. Assays performed for each subject**

|                    | Subject             | Sex    | Age at Enrollment | Race                                    | Ethnicity Hispanic / Latino | Figure 1 | Figure 2 | Figure 3 | Figure 4 | Figure 5 | Ext. Data Figure 1 | Ext. Data Figure 2 | Ext. Data Figure 4 | Ext. Data Figure 5 | Ext. Data Figure 6 | Ext. Data Figure 7 | Ext. Data Figure 8 | Ext. Data Figure 10 | Ext. Data Figure 11 | Ext. Data Figure 12 |   |
|--------------------|---------------------|--------|-------------------|-----------------------------------------|-----------------------------|----------|----------|----------|----------|----------|--------------------|--------------------|--------------------|--------------------|--------------------|--------------------|--------------------|---------------------|---------------------|---------------------|---|
| <b>Siltuximab</b>  | EMU202 <sup>1</sup> | Female | 29                | White, Caucasian                        | No                          | X        | X        | X        | X        | X        | X                  | X                  | X                  | X                  | X                  | X                  | X                  | X                   | X                   |                     |   |
|                    | EMU204              | Male   | 33                | White, Caucasian                        | No                          | X        | X        | X        | X        | X        | X                  | X                  | X                  | X                  | X                  |                    |                    | X                   | X                   |                     |   |
|                    | EMU205 <sup>2</sup> | Male   | 37                | White, Caucasian                        | No                          | X        | X        | X        | X        | X        | X                  | X                  | X                  | X                  | X                  | X                  | X                  | X                   | X                   |                     |   |
|                    | EMU206              | Male   | 21                | Native Hawaiian, Other Pacific Islander | No                          | X        | X        | X        | X        | X        | X                  | X                  | X                  | X                  | X                  | X                  |                    |                     | X                   | X                   | X |
|                    | EMU207 <sup>3</sup> | Male   | 25                | White, Caucasian                        | No                          | X        | X        | X        | X        | X        | X                  | X                  | X                  | X                  | X                  | X                  | X                  | X                   | X                   | X                   |   |
|                    | EMU209              | Female | 21                | White, Caucasian                        | No                          |          | X        | X        | X        | X        |                    |                    |                    |                    |                    |                    | X                  |                     | X                   | X                   | X |
|                    | EMU211 <sup>4</sup> | Female | 22                | White, Caucasian                        | No                          | X        | X        | X        | X        |          | X                  | X                  | X                  | X                  | X                  | X                  | X                  | X                   | X                   | X                   | X |
|                    | EMU215              | Female | 21                | White, Caucasian                        | No                          |          | X        | X        | X        | X        |                    |                    |                    |                    |                    |                    | X                  |                     | X                   | X                   |   |
|                    | EMU216              | Male   | 25                | White, Caucasian                        | No                          | X        | X        | X        | X        | X        | X                  | X                  | X                  | X                  | X                  | X                  |                    |                     | X                   | X                   | X |
|                    | EMU217 <sup>5</sup> | Male   | 37                | White, Caucasian                        | No                          | X        | X        | X        | X        | X        | X                  | X                  | X                  | X                  | X                  | X                  | X                  | X                   | X                   | X                   | X |
| <b>Tocilizumab</b> | EMU101 <sup>1</sup> | Female | 30                | White, Caucasian                        | No                          | X        | X        | X        | X        | X        | X                  |                    | X                  | X                  | X                  | X                  | X                  | X                   | X                   |                     |   |
|                    | EMU103 <sup>2</sup> | Female | 22                | White, Caucasian                        | No                          | X        | X        | X        | X        | X        | X                  |                    | X                  | X                  | X                  | X                  | X                  | X                   | X                   |                     |   |
|                    | EMU104 <sup>3</sup> | Male   | 38                | White, Caucasian                        | No                          | X        |          | X        | X        | X        | X                  |                    | X                  | X                  | X                  |                    |                    | X                   | X                   | X                   |   |
|                    | EMU105 <sup>4</sup> | Male   | 26                | White, Caucasian                        | No                          | X        |          | X        | X        | X        | X                  |                    | X                  | X                  | X                  |                    |                    | X                   | X                   | X                   |   |
|                    | EMU106 <sup>5</sup> | Male   | 38                | White, Caucasian                        | No                          | X        | X        | X        |          |          | X                  |                    | X                  | X                  | X                  | X                  | X                  |                     |                     |                     |   |
|                    | EMU107              | Female | 30                | White, Caucasian                        | No                          | X        |          | X        | X        | X        | X                  |                    | X                  | X                  | X                  |                    |                    |                     | X                   | X                   |   |
|                    | EMU109              | Male   | 29                | White, Caucasian                        | No                          | X        | X        | X        |          |          | X                  |                    | X                  | X                  | X                  | X                  |                    |                     |                     |                     |   |
|                    | EMU110              | Female | 31                | White, Caucasian                        | No                          | X        | X        | X        | X        | X        | X                  |                    | X                  | X                  | X                  | X                  |                    |                     | X                   | X                   |   |
|                    | EMU111              | Male   | 30                | White, Caucasian                        | No                          | X        | X        | X        | X        | X        | X                  |                    | X                  | X                  | X                  | X                  |                    |                     | X                   | X                   |   |
|                    | EMU116              | Female | 20                | White, Caucasian                        | No                          |          |          |          | X        | X        |                    |                    |                    |                    |                    |                    |                    |                     | X                   | X                   |   |
|                    | EMU118              | Male   | 23                | White, Caucasian                        | No                          |          |          |          | X        | X        |                    |                    |                    |                    |                    |                    |                    |                     | X                   | X                   |   |
|                    | EMU119              | Male   | 41                | White, Caucasian                        | No                          |          |          |          | X        | X        |                    |                    |                    |                    |                    |                    |                    |                     |                     |                     |   |

<sup>1-5</sup> Overlapping subjects enrolled in both studies. Number pairs indicate same subject.

**Supplemental Table 2. Flow cytometry antibodies used in the study**

| Assay                                                                                                    | Target                          | Clone                       | Format          | Vendor                   |                          |
|----------------------------------------------------------------------------------------------------------|---------------------------------|-----------------------------|-----------------|--------------------------|--------------------------|
| <b>Phospho-flow: IL-6/pSTAT3, pSTAT1</b>                                                                 | CD8                             | RPA-T8                      | BUV395          | BD Biosciences           |                          |
|                                                                                                          | CD27                            | L128                        | BV421           | BD Biosciences           |                          |
|                                                                                                          | CD4                             | SK3                         | eVolve605       | Biolegend                |                          |
|                                                                                                          | CD127                           | eBioRDR5                    | BV786           | Biolegend                |                          |
|                                                                                                          | CD33                            | P67.6                       | FITC            | Biolegend                |                          |
|                                                                                                          | CD3                             | UCHT1                       | PerCP-Cy5.5     | Biolegend                |                          |
|                                                                                                          | pSTAT3                          | 4/pSTAT3                    | PE              | BD Biosciences           |                          |
|                                                                                                          | CD25                            | M-A251                      | PE-CF594        | BD Biosciences           |                          |
|                                                                                                          | CD56                            | NCAM16.2                    | PE-Cy7          | BD Biosciences           |                          |
|                                                                                                          | pSTAT1                          | 4a                          | Ax647           | BD Biosciences           |                          |
|                                                                                                          | CD45RA                          | HI100                       | Alexa Fluor 700 | BD Biosciences           |                          |
|                                                                                                          |                                 | LIVE/DEAD FIXABLE Stain kit | N/A             | Blue 488nm               | Thermo Fisher Scientific |
|                                                                                                          | <b>IL-6 Receptor Expression</b> | CD38                        | HB7             | BUV395                   | BD Biosciences           |
| CD8                                                                                                      |                                 | SK1                         | BUV737          | BD Biosciences           |                          |
| CCR6                                                                                                     |                                 | G0434E3                     | BV421           | Biolegend                |                          |
| CD24                                                                                                     |                                 | ML5                         | BV510           | Biolegend                |                          |
| CD45RA                                                                                                   |                                 | HI100                       | eVolve605       | eBioscience              |                          |
| CD4                                                                                                      |                                 | SK3                         | eVolve655       | eBioscience              |                          |
| CD127                                                                                                    |                                 | A019D5                      | BV786           | Biolegend                |                          |
| CCR5                                                                                                     |                                 | 3A9                         | BB515           | BD Biosciences           |                          |
| CD3                                                                                                      |                                 | UCHT1                       | PerCP-Cy5.5     | Biolegend                |                          |
| ADAM17                                                                                                   |                                 | I116333                     | PE              | R&D Systems              |                          |
| CD25                                                                                                     |                                 | M-A251                      | PE-CF594        | BD Biosciences           |                          |
| IL-6R                                                                                                    |                                 | UV4                         | PE-Cy7          | Biolegend                |                          |
| IL-6R                                                                                                    |                                 | M5                          | PE              | BD Biosciences           |                          |
| ADAM10                                                                                                   |                                 | SHM14                       | APC             | Biolegend                |                          |
| CD19                                                                                                     |                                 | HIB19                       | AF700           | Biolegend                |                          |
| CCR7                                                                                                     |                                 | G043H7                      | APC-Cy          | Biolegend                |                          |
|                                                                                                          |                                 | LIVE/DEAD FIXABLE Stain kit | N/A             | Blue 488nm               | Thermo Fisher Scientific |
| <b>Intracellular Staining</b>                                                                            | IFN $\gamma$                    | B27                         | BUV395          | BD Biosciences           |                          |
|                                                                                                          | CD8                             | SK1                         | BUV737          | BD Biosciences           |                          |
|                                                                                                          | PD-1                            | EH12.2H7                    | BV421           | Biolegend                |                          |
|                                                                                                          | PD-1                            | EH12.2H7                    | BV785           | Biolegend                |                          |
|                                                                                                          | CD161                           | HP-3G10                     | BV510           | Biolegend                |                          |
|                                                                                                          | CD45RA                          | HI100                       | eVolve605       | eBioscience              |                          |
|                                                                                                          | CD4                             | SK3                         | eVolve655       | eBioscience              |                          |
|                                                                                                          | Ox40                            | ACT35                       | BV711           | Biolegend                |                          |
|                                                                                                          | CXCR5                           | J252D4                      | BV786           | Biolegend                |                          |
|                                                                                                          | CXCR5                           | RF8B2                       | BV421           | BD Biosciences           |                          |
|                                                                                                          | Helios                          | 22F6                        | FITC            | Biolegend                |                          |
|                                                                                                          | IL-21                           | 3A3-N2.1                    | PE              | BD Biosciences           |                          |
|                                                                                                          | FOXP3                           | 259D/C7                     | PE-CF594        | BD Biosciences           |                          |
|                                                                                                          | ICOS                            | C398.4A                     | PE-Cy7          | Biolegend                |                          |
|                                                                                                          | IL-4                            | 8D4-8                       | APC             | BD Biosciences           |                          |
|                                                                                                          | CD3                             | HIT3a                       | Alexa Fluor 700 | Biolegend                |                          |
|                                                                                                          | IL-17A                          | BL168                       | APC-Cy7         | Biolegend                |                          |
|                                                                                                          |                                 | LIVE/DEAD FIXABLE Stain kit | N/A             | Blue 488nm               | Thermo Fisher Scientific |
|                                                                                                          | <b>Suppression Assay</b>        | CD25                        | M-A251          | PE-Cy7                   | BD Biosciences           |
| CD3                                                                                                      |                                 | UCHT1                       | BV421           | Biolegend                |                          |
| CD4                                                                                                      |                                 | RPA-T4                      | APC-Cy7         | Biolegend                |                          |
| CD134                                                                                                    |                                 | ACT35                       | PE              | BD Biosciences           |                          |
| Cell proliferation dye                                                                                   |                                 | N/A                         | eFlour670       | eBioscience              |                          |
|                                                                                                          |                                 | LIVE/DEAD FIXABLE Stain kit | N/A             | Aqua 405nm               | Thermo Fisher Scientific |
| <b>EMU2 Phospho-flow: TCR/pSTAT3, pSTAT1, pSTAT5</b>                                                     | pSTAT3                          | 4/pSTAT3                    | PE              | BD Biosciences           |                          |
|                                                                                                          | CD45RA                          | HI100                       | BV421           | Biolegend                |                          |
|                                                                                                          | pSTAT5                          | 47                          | Alexa fluor 488 | BD Biosciences           |                          |
|                                                                                                          | CD4                             | RPA-T4                      | APC-Cy7         | Biolegend                |                          |
|                                                                                                          | pSTAT1                          | 4a                          | Alexa fluor 647 | BD Biosciences           |                          |
|                                                                                                          | CD8                             | RPA-T8                      | PerCP-Cy5.5     | Biolegend                |                          |
|                                                                                                          | CD25                            | M-A251                      | PE-Cy7          | BD Biosciences           |                          |
|                                                                                                          | CD5                             | UCHT2                       | BV605           | BD Biosciences           |                          |
|                                                                                                          | LIVE/DEAD FIXABLE Stain kit     | N/A                         | Aqua 405nm      | Thermo Fisher Scientific |                          |
| <b>EMU1 Phospho-flow: TCR/pSTAT3, pSTAT5, pSTAT1, tSTAT3</b>                                             | pSTAT3                          | 4/pSTAT3                    | PE              | BD Biosciences           |                          |
| <b>EMU2 Phosflow: unstimmed/pSTAT3, pSTAT5, pSTAT1, tSTAT3 (also did IL-10 stim as cytokine control)</b> | CD45RA                          | HI100                       | BV421           | Biolegend                |                          |
|                                                                                                          | pSTAT1                          | 4a                          | Alexa fluor 488 | BD Biosciences           |                          |
|                                                                                                          | CD4                             | RPA-T4                      | APC-Cy7         | Biolegend                |                          |
|                                                                                                          | CD27                            | L128                        | BV711           | BD Biosciences           |                          |
|                                                                                                          | tSTAT3                          | M59-50                      | APC             | BD Biosciences           |                          |
|                                                                                                          | CD8                             | RPA-T8                      | PerCP-Cy5.5     | Biolegend                |                          |
|                                                                                                          | pSTAT5                          | 47                          | PE-Cy7          | BD Biosciences           |                          |
|                                                                                                          | CD5                             | UCHT2                       | BV605           | BD Biosciences           |                          |
|                                                                                                          |                                 | LIVE/DEAD FIXABLE Stain kit | N/A             | Aqua 405nm               | Thermo Fisher Scientific |

**Supplemental Table 2 (cont.).**

|                                                    |                             |             |                    |                          |
|----------------------------------------------------|-----------------------------|-------------|--------------------|--------------------------|
| <b>EMU2: Surface stains Cytokine Receptor</b>      | IL-10R/CD210                | REAaffinity | PE                 | Miltenyi                 |
|                                                    | IL-27a                      | FAB         | FITC/Vio-Bright515 | R&D Systems              |
|                                                    | CD4                         | RPA-T4      | PerCP-Cy5.5        | Biologend                |
|                                                    | IL-21a                      | 17A12       | PE-Cy7             | Biologend                |
|                                                    | CD3                         | UCHT1       | BV711              | Biologend                |
|                                                    | gp130                       | 2E1B02      | PE/Dazzle          | Biologend                |
|                                                    | CD45RA                      | HI100       | BV421              | Biologend                |
|                                                    | IL-10R2/CD210b              | REA848      | APC                | Miltenyi                 |
|                                                    | LIVE/DEAD FIXABLE Stain kit | N/A         | Aqua 405nm         | Thermo Fisher Scientific |
| <b>EMU1: Intracellular Staining: tSTAT1,tSTAT5</b> | tSTAT5                      | REA549      | PE                 | Miltenyi                 |
|                                                    | CD45RA                      | HI100       | BV421              | Biologend                |
|                                                    | CD27                        | L128        | Alexa fluor 488    | BD Biosciences           |
|                                                    | CD4                         | RPA-T4      | APC-Cy7            | Biologend                |
|                                                    | tSTAT1                      | 1/STAT1     | Alexa fluor 647    | BD Biosciences           |
|                                                    | CD25                        | MA-251      | PE-Cy7             | BD Biosciences           |
|                                                    | CD5                         | UCHT2       | BV605              | BD Biosciences           |
|                                                    | LIVE/DEAD FIXABLE Stain kit | N/A         | Aqua 405nm         | Thermo Fisher Scientific |
